# Supplementary material
Source: publisher figshare collection journal article supplement (https://acs.figshare.com/ndownloader/files/17439680)
Supplement: Supplementary file 1 [file 17439680]

## Supporting Information

### **Systematic Study of the Electronic, Carbon and N-doping Effects of CoMn Oxide Composites as Bifunctional Oxygen Electrocatalysts**

Ye Hu,<sup>† ⊥</sup> Hengquan Chen,<sup>† ⊥</sup> Xingmin Zhang,<sup>‡</sup> Wen Wen,<sup>‡</sup> Qinggang He,<sup>\*,#</sup>

Chaohong He<sup>\*,†</sup>

<sup>†</sup> College of Chemical and Biological Engineering, Zhejiang University, Hangzhou, 310027, P.R. China

<sup>‡</sup> Shanghai Synchrotron Radiation Facility, Shanghai Institute of Applied Physics, Chinese Academy of Sciences, Shanghai 201204, China

<sup>#</sup> Ningbo Research Institute, Zhejiang University, Ningbo, Zhejiang 315100, China

### **Synthesis of $\text{Co}_3\text{O}_4$ .**

In a typical synthesis, 6 mL of  $\text{Co}(\text{NO}_3)_2$  solution (0.5 M) and 9 mL of ammonia (25 wt%) were slowly added into 6 mL DI water under constant stirring. The mixture was stirred for 60 min and then heated at 180 °C for 60 min. The final product was washed with deionized water and dried at 60 °C overnight.

### **Synthesis of $\text{MnO}_2$**

In a typical synthesis of  $\text{MnO}_2$ , 0.3951 g  $\text{KMnO}_4$  was first dissolved in 35 mL deionized water under constant stirring. Then, 0.87 mL of concentrated HCl solution (37 wt%) was slowly added to the above  $\text{KMnO}_4$  solution. The mixture was transferred into an autoclave (50 mL) and then heated at 140 °C for 12 h.  $\text{Mn}_x\text{Co}_{2-x}\text{O}_2$  was synthesized using the same procedure by adding different amounts of  $\text{Co}(\text{Cl})_2$  solution.

### **Synthesis of $\text{Mn}_2\text{O}_3$ :**

A total of 25 mmol of  $\text{MnSO}_4$  and 25 mmol of  $\text{Na}_2\text{CO}_3$  were added to 30 mL deionized water under constant stirring. The resulting precipitate was calcined for 4 h at 600 °C.

### **Synthesis of $\text{Mn}_3\text{O}_4$ :**

$\text{Mn}(\text{CH}_3\text{COO})_2$  (0.2541 g) was dissolved in 40 mL deionized water. NaOH solution (7.5 M) was slowly added under constant stirring. The mixture was transferred into an autoclave (50 mL) and then heated at 160 °C for 10 h. The resulting precipitate was

washed with deionized water, dried at 60 °C overnight, and finally calcined at 400 °C for 1 h in a muffle furnace.

#### **Synthetic of Co<sub>2.25</sub>Mn<sub>0.75</sub>O<sub>4</sub>/CNT-H (hydrothermal)**

CNTs (0.0225 g) were dispersed in a mixture of 30 mL ethanol and 1.375 mL deionized water by ultrasonication for 20 min. A total of 0.51 mmol Co(NO<sub>3</sub>)<sub>2</sub> and 0.17 mmol Mn(NO<sub>3</sub>)<sub>3</sub> were dissolved into the above solution under constant stirring. Then, 0.625 mL ammonia (25 wt%) was dropped into the mixture. The resulting suspension was kept at 70 °C under magnetic stirring for 24 h. After that, the mixture was transferred into a 50 mL autoclave for hydrothermal reaction at 150 °C for 3 h. The resulting product was washed with deionized water and dried at 60 °C.

#### **Synthesis of NCNTs**

CNTs and melamine were mixed together by thorough grinding. NCNTs were prepared by pyrolyzing the CNT-melamine composite at 800 °C for 2 h in an Ar atmosphere.

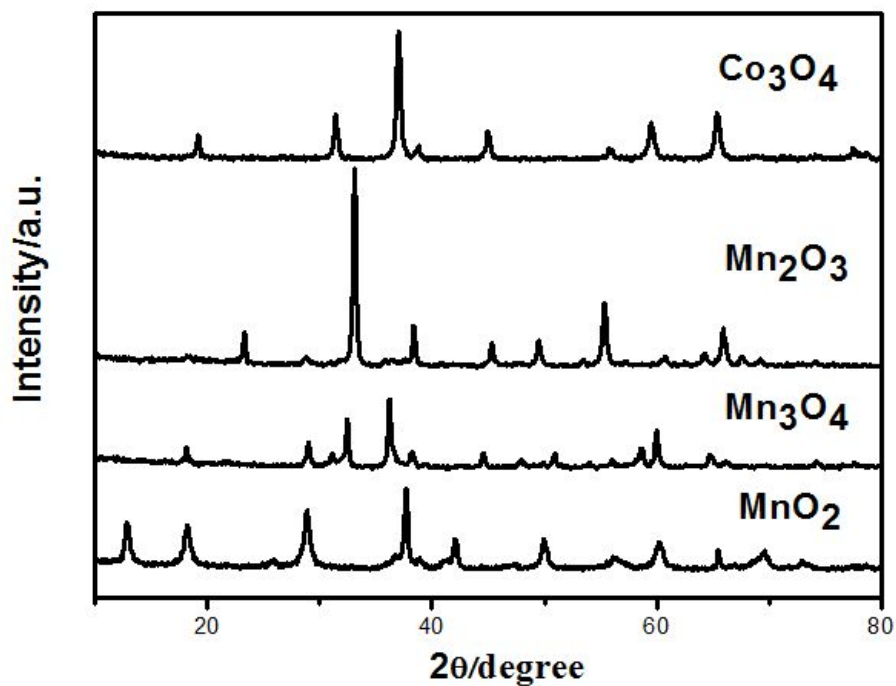

**Figure S1.** XRD patterns of  $\text{Co}_3\text{O}_4$ ,  $\text{Mn}_3\text{O}_4$ ,  $\text{Mn}_2\text{O}_3$  and  $\text{MnO}_2$

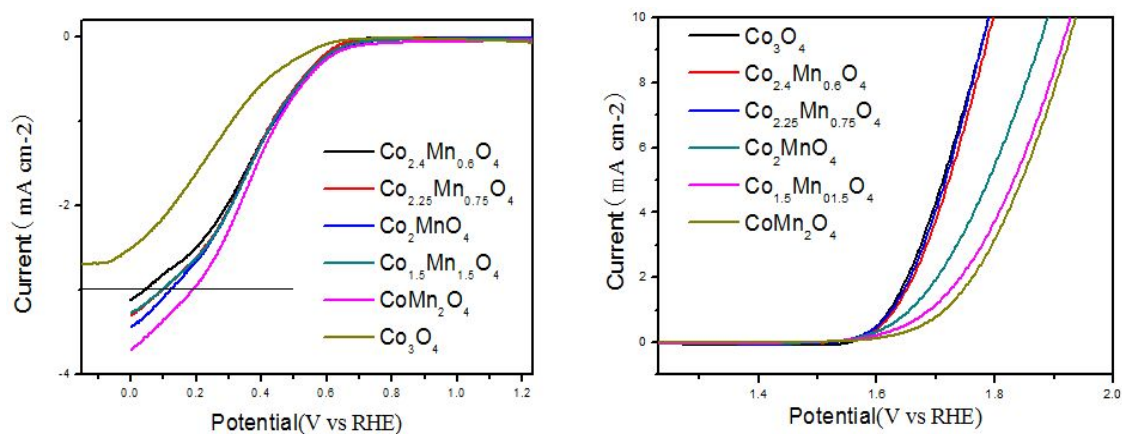

**Figure S2.** ORR and OER polarization curves of  $\text{Co}_x\text{Mn}_{3-x}\text{O}_4$  in 0.1 M  $\text{O}_2$ -saturated KOH solution at 900 rpm; the scan rate is  $5 \text{ mV} \cdot \text{s}^{-1}$ ; the electrode loading for all samples is  $250 \mu\text{gcat} \cdot \text{cm}^{-2}$ .

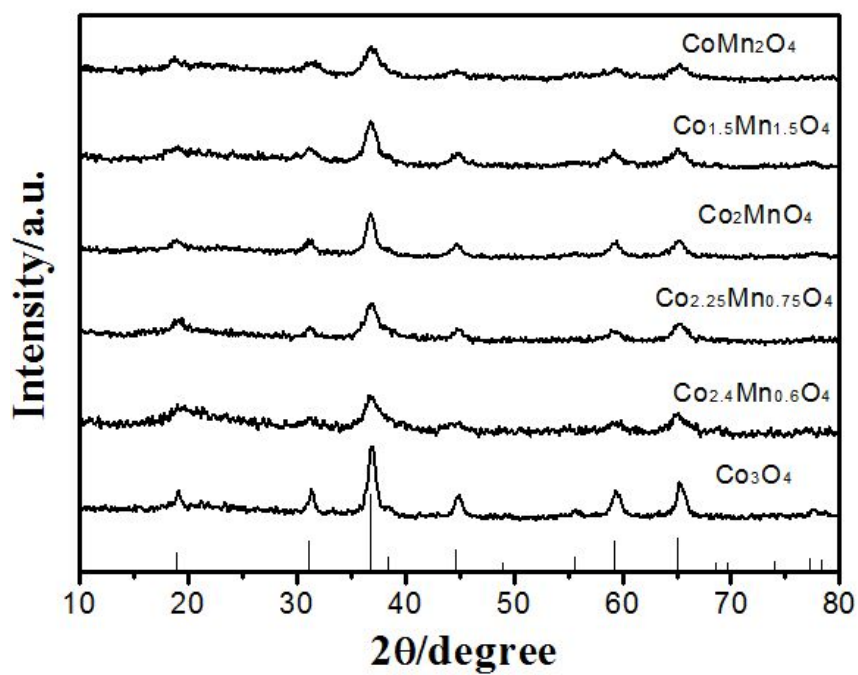

**Figure S3.** XRD patterns of  $\text{CoMn}_2\text{O}_4$ ,  $\text{Co}_{1.5}\text{Mn}_{1.5}\text{O}_4$ ,  $\text{Co}_2\text{MnO}_4$ ,  $\text{Co}_{2.25}\text{Mn}_{0.75}\text{O}_4$ ,  $\text{Co}_{2.4}\text{Mn}_{0.6}\text{O}_4$  and  $\text{Co}_3\text{O}_4$

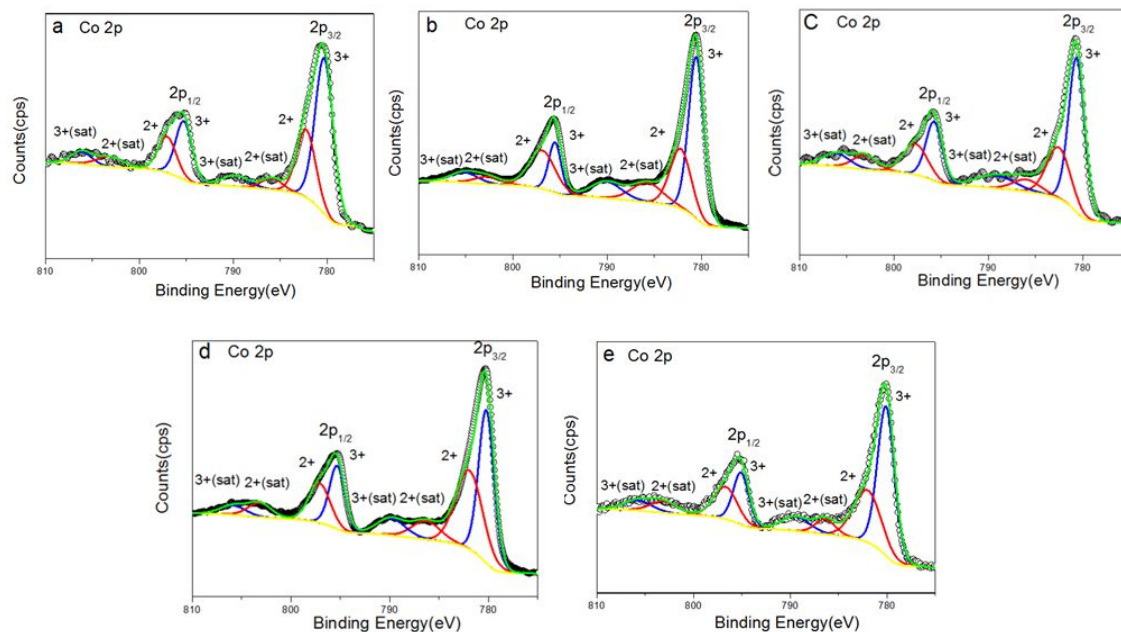

**Figure S4.** XPS Co 2p spectra of  $\text{Co}_x\text{Mn}_{3-x}\text{O}_4$ : (a)  $\text{Co}_3\text{O}_4$ , (b)  $\text{Co}_{2.4}\text{Mn}_{0.6}\text{O}_4$ , (c)  $\text{Co}_{2.25}\text{Mn}_{0.75}\text{O}_4$ , (d)  $\text{Co}_2\text{MnO}_4$ , (e)  $\text{Co}_{1.5}\text{Mn}_{1.5}\text{O}_4$

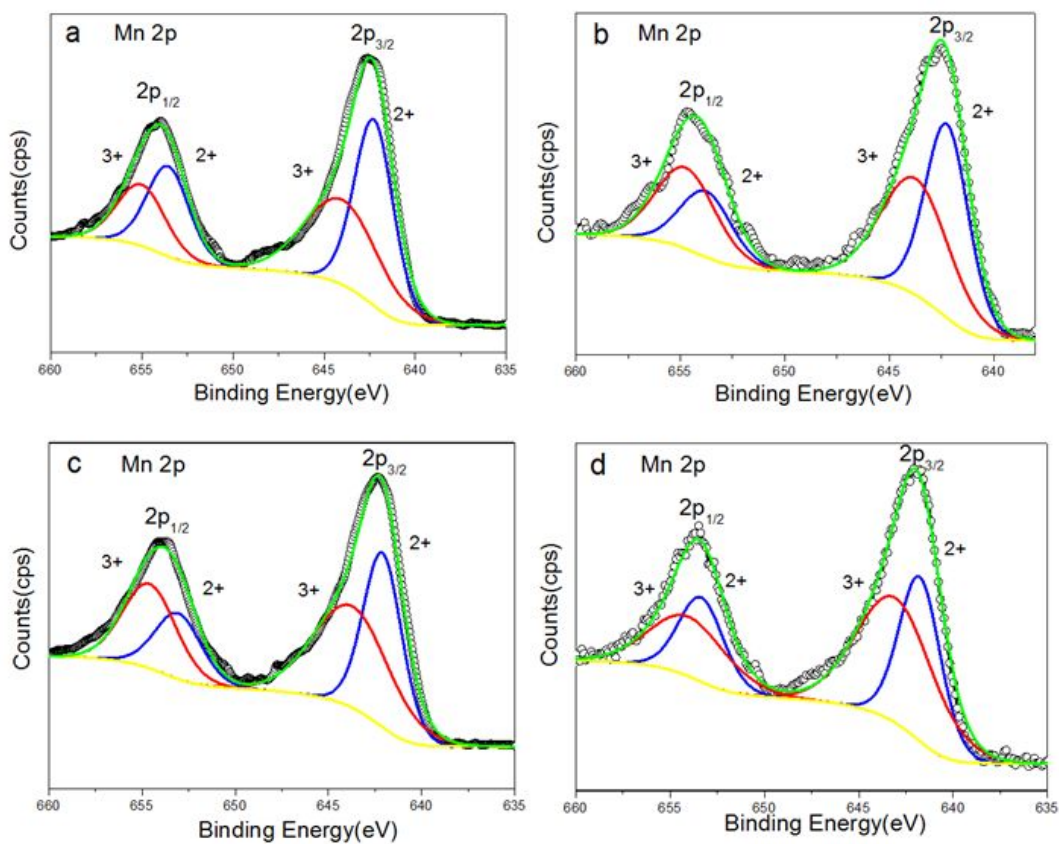

**Figure S5.** XPS Mn 2p spectra of  $\text{Co}_x\text{Mn}_{3-x}\text{O}_4$ : (a)  $\text{Co}_{2.4}\text{Mn}_{0.6}\text{O}_4$ , (b)  $\text{Co}_{2.25}\text{Mn}_{0.75}\text{O}_4$ , (c)  $\text{Co}_2\text{MnO}_4$ , (d)  $\text{Co}_{1.5}\text{Mn}_{1.5}\text{O}_4$

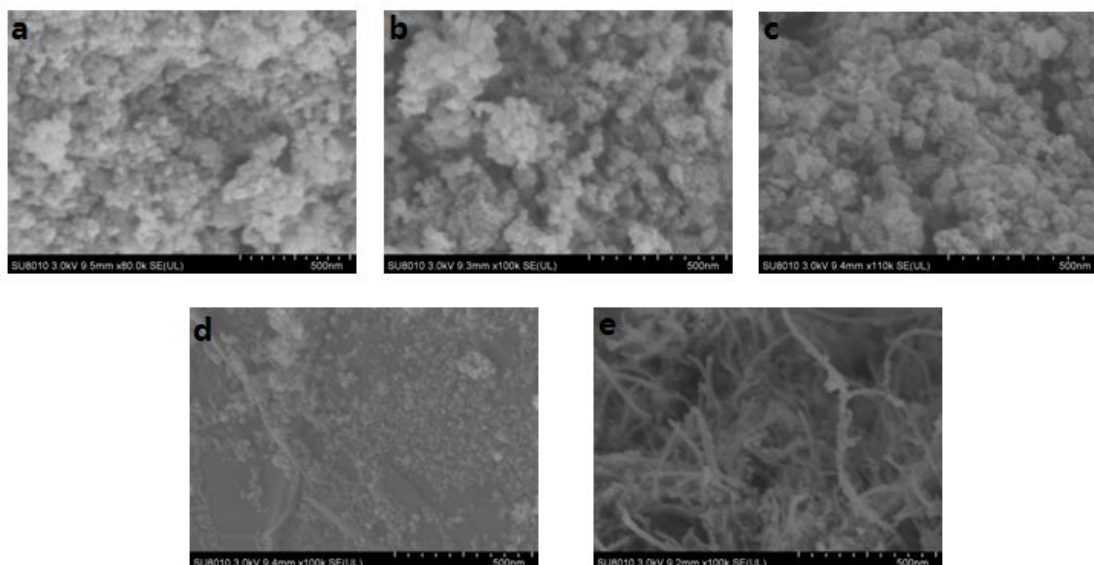

**Figure S6.** SEM images of  $\text{Co}_{2.25}\text{Mn}_{0.75}\text{O}_4/\text{carbon}$ : (a) EC-300, (b) EC-600JD, (c) Vulcan, (d) Graphene, and (e) CNTs

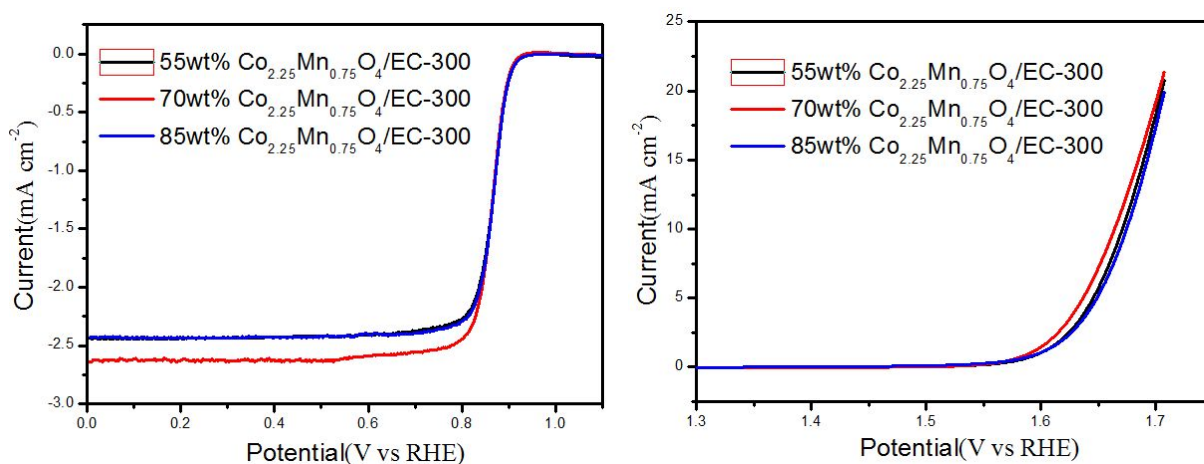

**Figure S7.** ORR and OER polarization curve of 55 wt%  $\text{Co}_{2.25}\text{Mn}_{0.75}\text{O}_4/\text{EC-300}$ , 70 wt%  $\text{Co}_{2.25}\text{Mn}_{0.75}\text{O}_4/\text{EC-300}$  and 85 wt%  $\text{Co}_{2.25}\text{Mn}_{0.75}\text{O}_4/\text{EC-300}$  in 1 M  $\text{O}_2$ -saturated KOH solution at 900 rpm; the scan rate is  $5 \text{ mV} \cdot \text{s}^{-1}$ ; the electrode loading for all samples is  $250 \mu\text{gcat} \cdot \text{cm}^{-2}$ .

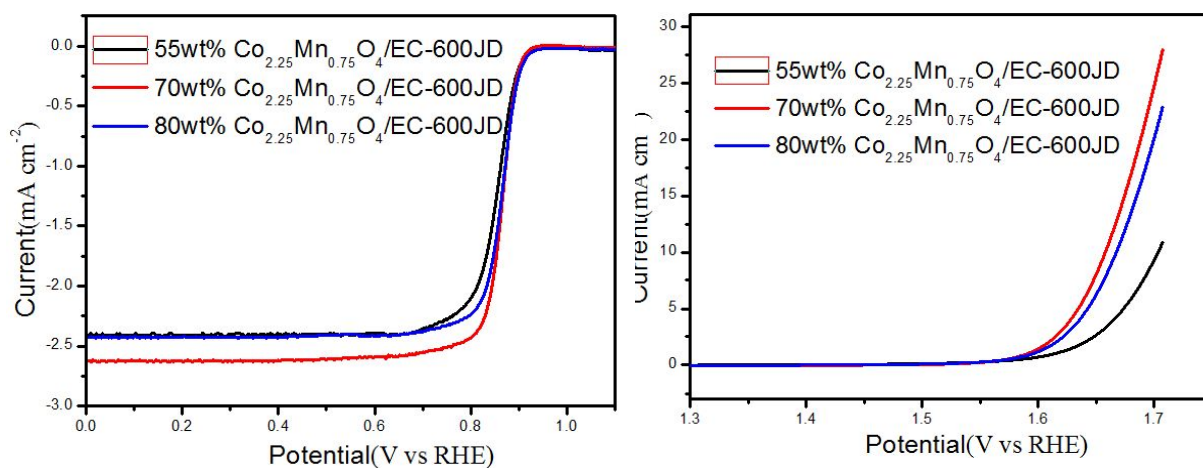

**Figure S8.** ORR and OER polarization curve of 55wt%  $\text{Co}_{2.25}\text{Mn}_{0.75}\text{O}_4/\text{EC-600JD}$ , 70wt%  $\text{Co}_{2.25}\text{Mn}_{0.75}\text{O}_4/\text{EC-600JD}$  and 85wt%  $\text{Co}_{2.25}\text{Mn}_{0.75}\text{O}_4/\text{EC-600JD}$  in 1 M  $\text{O}_2$ -saturated KOH solution at 900 rpm; the scan rate is  $5 \text{ mV} \cdot \text{s}^{-1}$ ; the electrode loading for all samples is  $250 \mu\text{gcat} \cdot \text{cm}^{-2}$ .

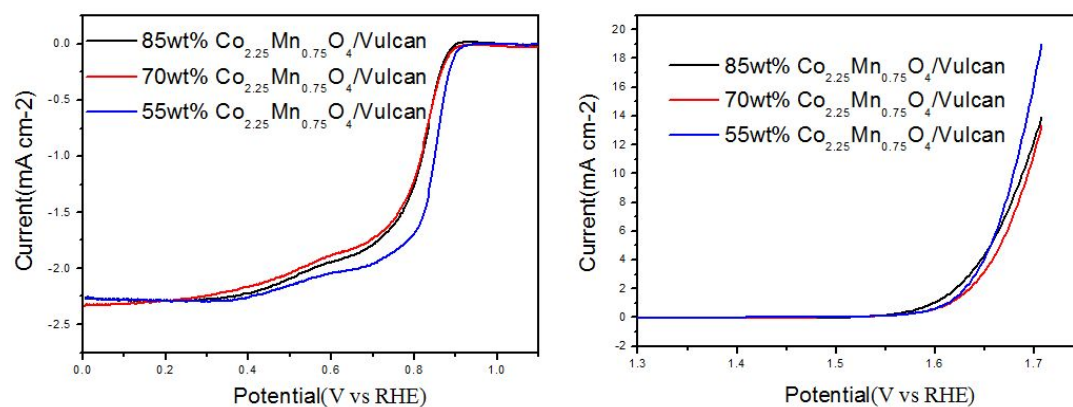

**Figure S9.** ORR and OER polarization curve of 55wt%  $\text{Co}_{2.25}\text{Mn}_{0.75}\text{O}_4/\text{Vulcan}$ , 70wt%  $\text{Co}_{2.25}\text{Mn}_{0.75}\text{O}_4/\text{Vulcan}$  and 85wt%  $\text{Co}_{2.25}\text{Mn}_{0.75}\text{O}_4/\text{Vulcan}$  in 1 M  $\text{O}_2$ -saturated KOH solution at 900 rpm; the scan rate is  $5 \text{ mV} \cdot \text{s}^{-1}$ ; the electrode loading for all samples is  $250 \mu\text{gcat} \cdot \text{cm}^{-2}$ .



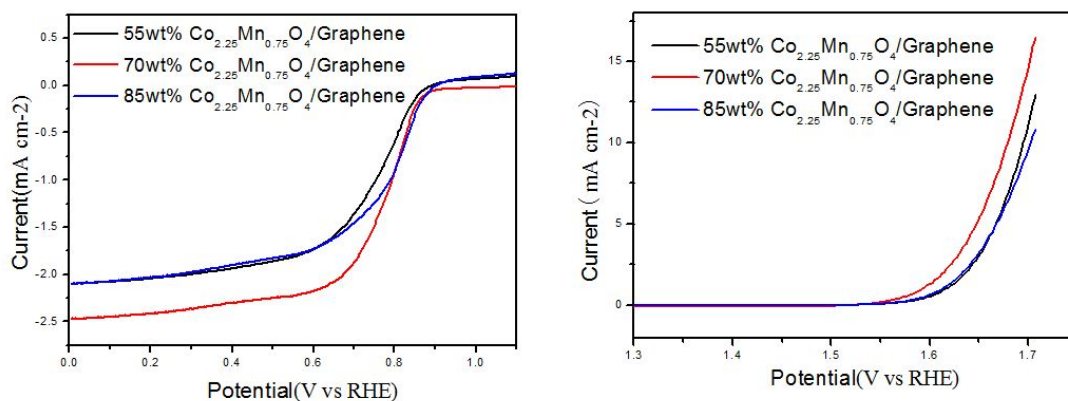

**Figure S10.** ORR and OER polarization curve of 55wt%  $\text{Co}_{2.25}\text{Mn}_{0.75}\text{O}_4/\text{Graphene}$ , 70wt%  $\text{Co}_{2.25}\text{Mn}_{0.75}\text{O}_4/\text{Graphene}$  and 85wt%  $\text{Co}_{2.25}\text{Mn}_{0.75}\text{O}_4/\text{Graphene}$  in 1 M  $\text{O}_2$ -saturated KOH solution at 900 rpm; the scan rate is  $5 \text{ mV} \cdot \text{s}^{-1}$ ; the electrode loading for all samples is  $250 \mu\text{gcat} \cdot \text{cm}^{-2}$ .

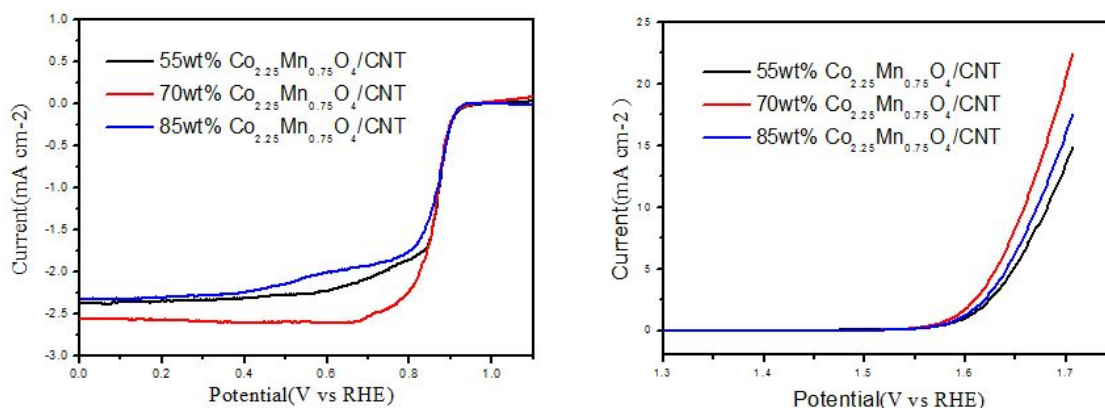

**Figure S11.** ORR and OER polarization curve of 55wt%  $\text{Co}_{2.25}\text{Mn}_{0.75}\text{O}_4/\text{CNT}$ , 70wt%  $\text{Co}_{2.25}\text{Mn}_{0.75}\text{O}_4/\text{CNT}$  and 85wt%  $\text{Co}_{2.25}\text{Mn}_{0.75}\text{O}_4/\text{CNT}$  in 1 M  $\text{O}_2$ -saturated KOH solution at 900 rpm; the scan rate is  $5 \text{ mV} \cdot \text{s}^{-1}$ ; the electrode loading for all samples is  $250 \mu\text{gcat} \cdot \text{cm}^{-2}$ .

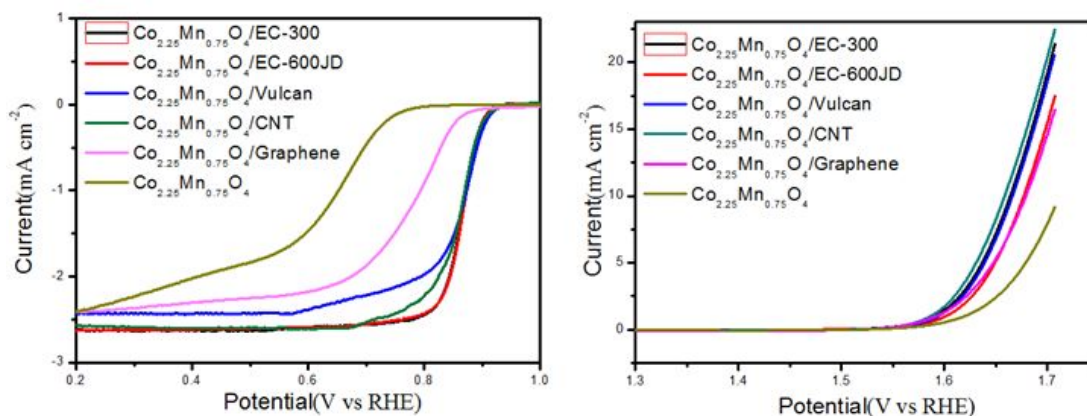

**Figure S12.** ORR and OER polarization curves of  $\text{Co}_{2.25}\text{Mn}_{0.75}\text{O}_4$  /carbon (EC-300, EC-600JD, Vulcan, Graphene, CNT) with identical content of CoMn oxide (70%) in 1 M  $\text{O}_2$ -saturated KOH solution at 900 rpm; the scan rate is  $5 \text{ mV} \cdot \text{s}^{-1}$ ; the electrode loading for all samples is  $250 \mu\text{gcat} \cdot \text{cm}^{-2}$ .

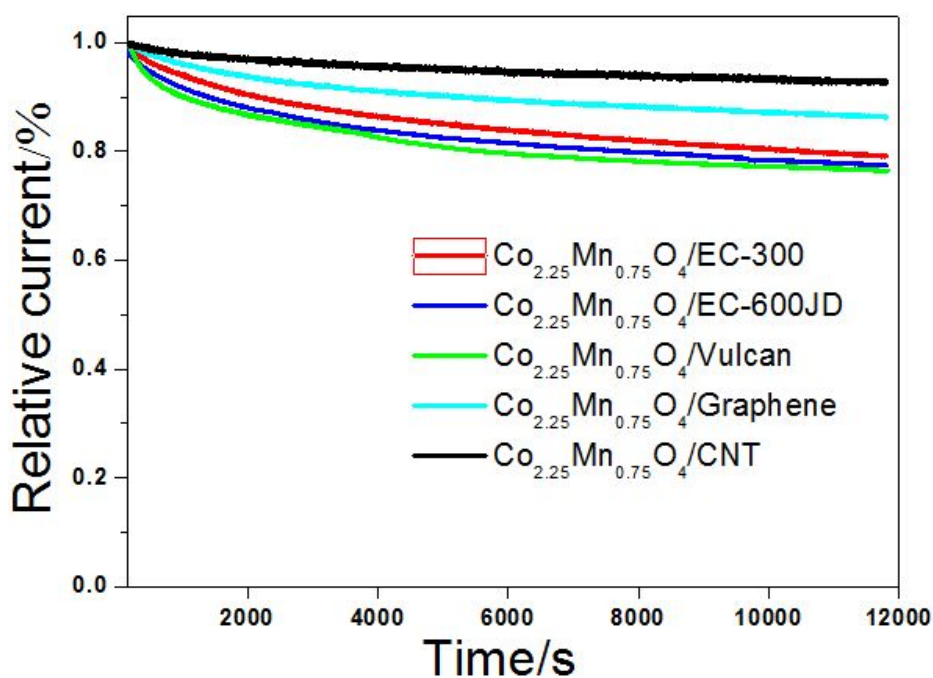

**Figure S13.** Chronoamperometric responses of  $\text{Co}_{2.25}\text{Mn}_{0.75}\text{O}_4$ /carbon (EC-300, EC-600JD, Vulcan, Graphene, CNT) based on the relative retained current (%) vs. time operated at 0.70 V in  $\text{O}_2$ -saturated 1 M KOH.

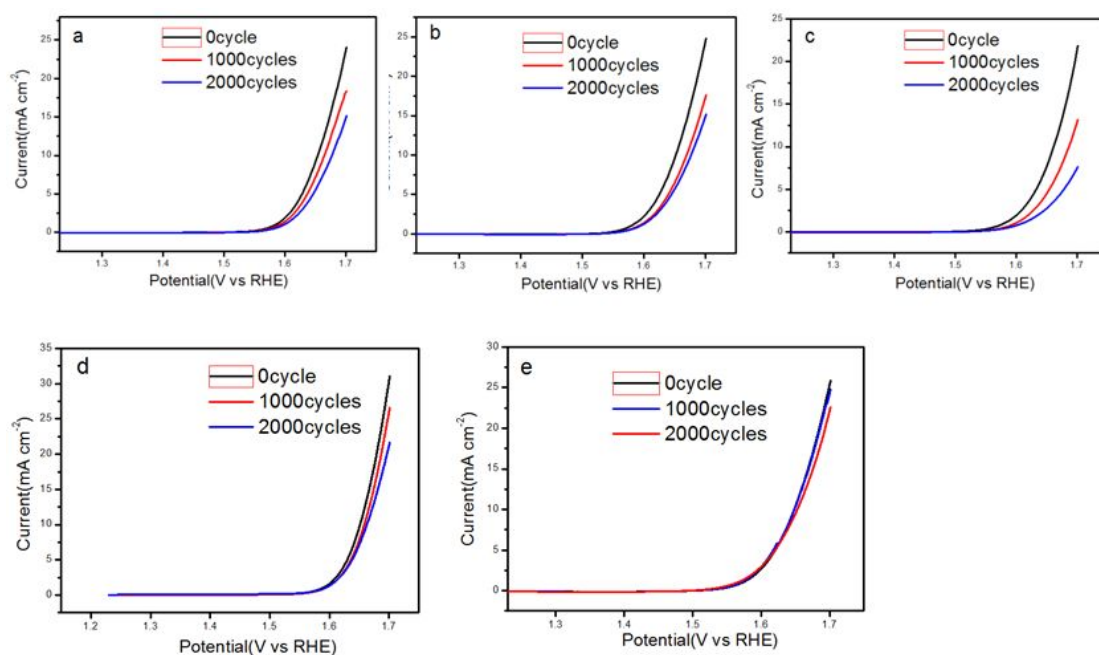

**Figure S14.** LSV curves of  $\text{Co}_{2.25}\text{Mn}_{0.75}\text{O}_4/\text{carbon}$  (EC-300, EC-600JD, Vulcan, Graphene, CNT) collected before and after 2000 cycles from 1.25 V to 1.65 V at 5 mV/s

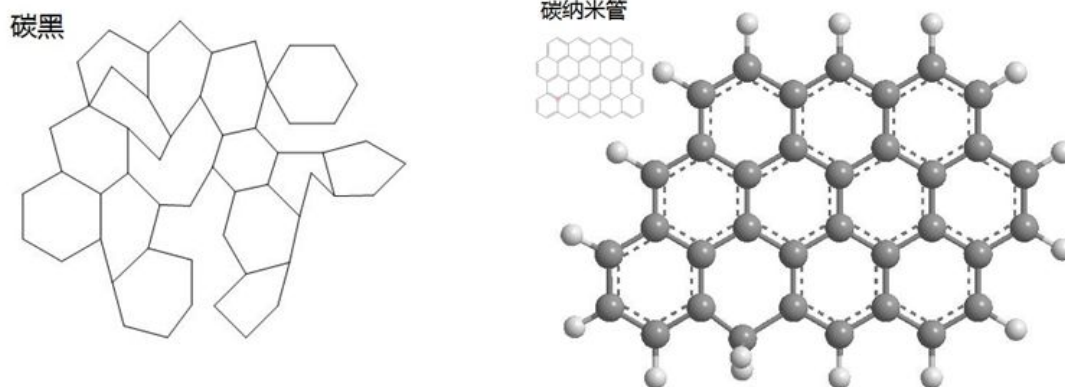

**Figure S15.** The structure of carbon black (EC-300) and carbon nanotube (CNT)

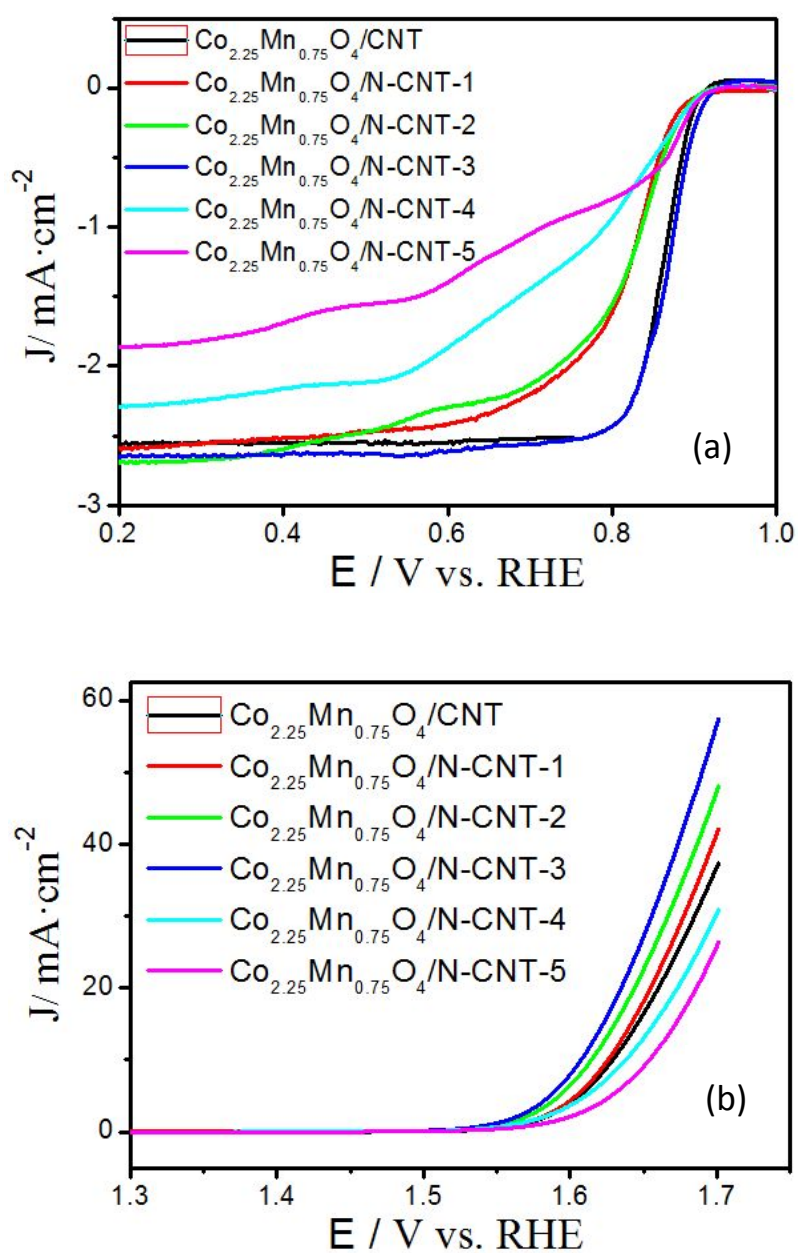

**Figure S16.** (a) ORR and (b) OER polarization curves for Co<sub>2.25</sub>Mn<sub>0.75</sub>O<sub>4</sub>/CNT and different Co<sub>2.25</sub>Mn<sub>0.75</sub>O<sub>4</sub>/NCNT samples in 1M O<sub>2</sub>-saturated KOH solution at 900 rpm. The scan rate is 5 mV·s<sup>-1</sup>. The loading for all catalysts is 250 μg cat · cm<sup>-2</sup>.

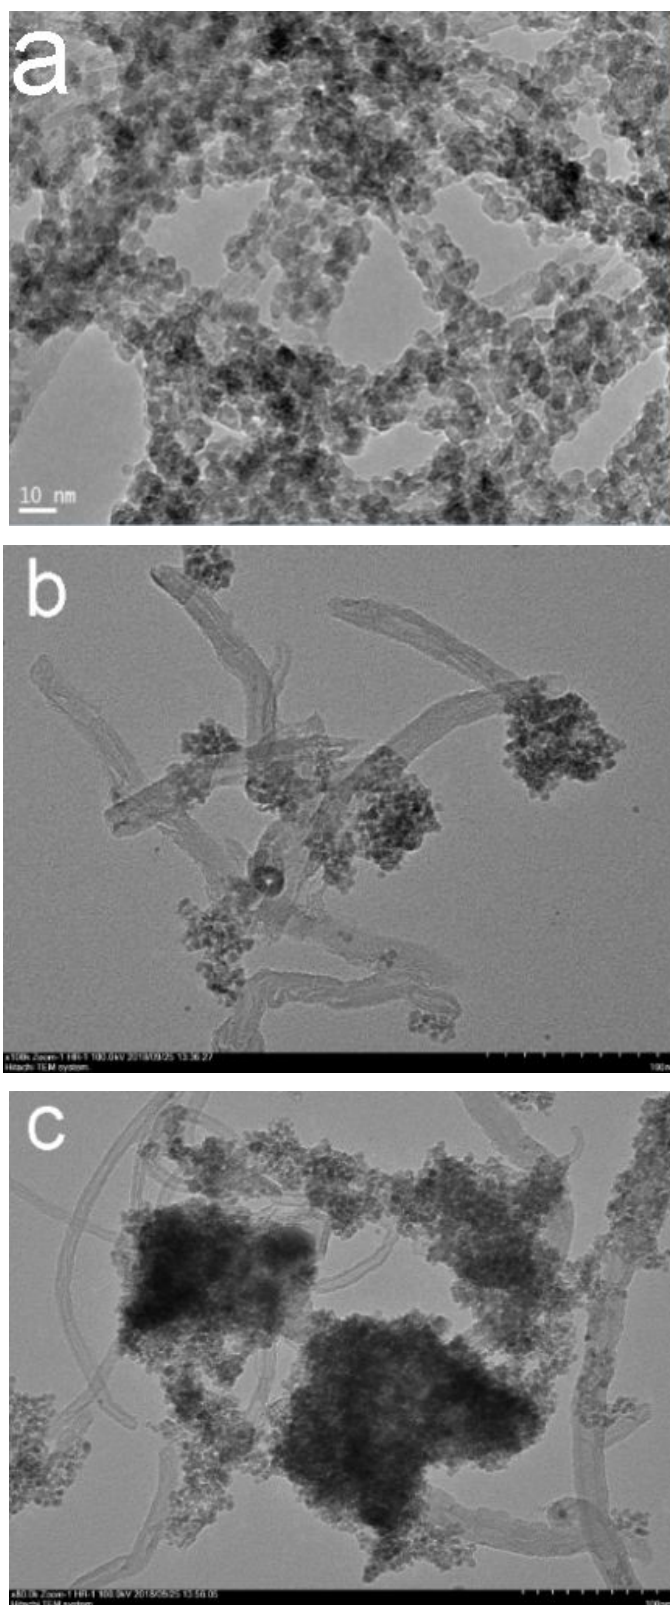

**Figure S17.** TEM pictures of  $\text{Co}_{2.25}\text{Mn}_{0.75}\text{O}_4/\text{CNT-3(a)}$  ,  $\text{Co}_{2.25}\text{Mn}_{0.75}\text{O}_4/\text{CNT-4}$  (b) and  $\text{Co}_{2.25}\text{Mn}_{0.75}\text{O}_4/\text{CNT-5(c)}$ .



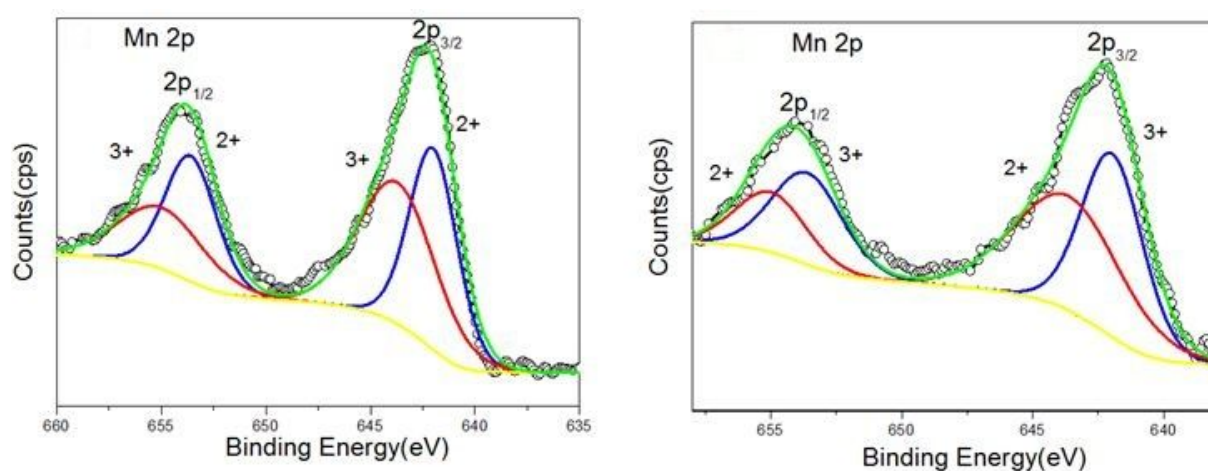

**Figure S18.** (a) XPS Mn 2p spectra of the Co<sub>2.25</sub>Mn<sub>0.75</sub>O<sub>4</sub>/CNT, (b) XPS Mn 2p spectra of the Co<sub>2.25</sub>Mn<sub>0.75</sub>O<sub>4</sub>/NCNT-3

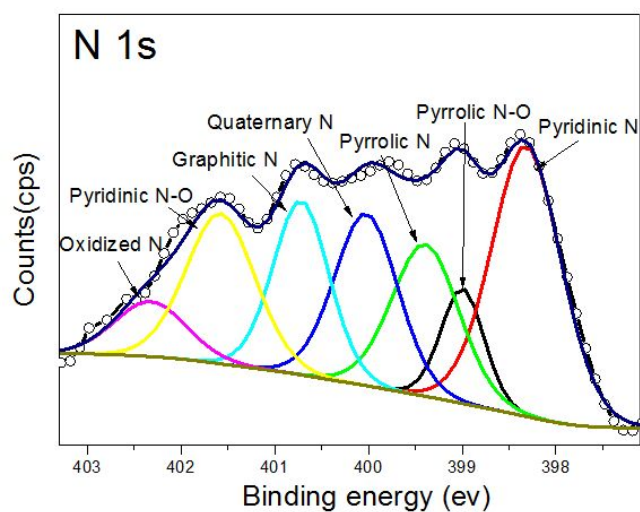

**Figure S19.** XPS N1s spectra of the Co<sub>2.25</sub>Mn<sub>0.75</sub>O<sub>4</sub>/NCNT-3

**Table S1.** Crystal structure information of metal oxides

| Material                | Crystal phase    | Space group   | Lattice parameters ( $\text{\AA}^3$ ) |
|-------------------------|------------------|---------------|---------------------------------------|
| $\text{Co}_3\text{O}_4$ | Cubic (FCC)      | Fd3m (227)    | 8.0837*8.0837*8.0837                  |
| $\text{MnO}_2$          | Tetragonal (BCC) | I4/m (87)     | 9.7847*9.7847*2.863                   |
| $\text{Mn}_2\text{O}_3$ | Cubic (BCC)      | Ia-3 (206)    | 9.4091*9.4091*9.4091                  |
| $\text{Mn}_3\text{O}_4$ | Tetragonal (BCC) | I41/amd (141) | 5.78*5.78*9.33                        |

**Table S2.** Changes of lattice parameters after Mn doping in  $\text{Co}_3\text{O}_4$ 

| Catalyst                                     | Crystal phase | Space group | Lattice parameters       | Cell volume        |
|----------------------------------------------|---------------|-------------|--------------------------|--------------------|
| $\text{Co}_3\text{O}_4$                      | Cubic         | Fd3m(227)   | $a=b=c=11.815\text{\AA}$ | $1649\text{\AA}^3$ |
| $\text{Co}_{2.4}\text{Mn}_{0.6}\text{O}_4$   | Cubic         | Fd3m(227)   | $a=b=c=11.825\text{\AA}$ | $1653\text{\AA}^3$ |
| $\text{Co}_{2.25}\text{Mn}_{0.75}\text{O}_4$ | Cubic         | Fd3m(227)   | $a=b=c=11.832\text{\AA}$ | $1656\text{\AA}^3$ |
| $\text{Co}_2\text{MnO}_4$                    | Cubic         | Fd3m(227)   | $a=b=c=11.839\text{\AA}$ | $1659\text{\AA}^3$ |
| $\text{Co}_{1.5}\text{Mn}_{1.5}\text{O}_4$   | Cubic         | Fd3m(227)   | $a=b=c=11.861\text{\AA}$ | $1664\text{\AA}^3$ |

**Table S3.** The valence states of Co and Mn species in the samples

| Sample                                       | $\text{Co}^{3+}/\text{Co}^{2+}$ | $\text{Mn}^{3+}/\text{Mn}^{2+}$ |
|----------------------------------------------|---------------------------------|---------------------------------|
| $\text{Co}_3\text{O}_4$                      | 1.81                            | --                              |
| $\text{Co}_{2.4}\text{Mn}_{0.6}\text{O}_4$   | 1.61                            | 0.76                            |
| $\text{Co}_{2.25}\text{Mn}_{0.75}\text{O}_4$ | 1.64                            | 1.10                            |
| $\text{Co}_2\text{MnO}_4$                    | 1.41                            | 1.25                            |
| $\text{Co}_{1.5}\text{Mn}_{1.5}\text{O}_4$   | 1.07                            | 1.35                            |

**Table S4.** Summary of electric conductivity of Co<sub>3</sub>O<sub>4</sub> and carbon (EC-300, EC-600JD, Vulcan, Graphene, CNT)

|                                | Electric Resistivity ( $\Omega \cdot \text{cm}$ ) | Surface area ( $\text{m}^2 \cdot \text{g}^{-1}$ ) | Particle Size (nm)  | Pore Volume (mL/100g) |
|--------------------------------|---------------------------------------------------|---------------------------------------------------|---------------------|-----------------------|
| Co <sub>3</sub> O <sub>4</sub> | 9.0*10 <sup>3</sup>                               | --                                                | --                  | --                    |
| EC-300                         | 3.9                                               | 800                                               | 50                  | 365                   |
| EC-600JD                       | 6.5                                               | 1400                                              | 30                  | 495                   |
| Vulcan                         | 108                                               | 254                                               | 30                  | 174                   |
| Graphene                       | 0.6                                               | 500                                               | D=0.3 $\mu\text{m}$ | --                    |
| CNT                            | 0.1                                               | 490                                               | L=5 $\mu\text{m}$   | OD=5nm                |

\* D, diameter; L, length; OD, outer diameter.

**Table S5.** Summary of bifunctional catalytic performance of Co<sub>2.25</sub>Mn<sub>0.75</sub>O<sub>4</sub>/Carbon (Carbon= EC-300, EC-600JD, Vulcan, Graphene, CNT)

| Catalyst                                                               | OER<br>( $E_{10}$ , $E_{\text{onset}}$ ) | ORR<br>( $E_{1/2}$ , $J_{\text{lim}}$ ) | $\Delta E$<br>( $E_{10}-E_{1/2}$ ) |
|------------------------------------------------------------------------|------------------------------------------|-----------------------------------------|------------------------------------|
| 55 wt% Co <sub>2.25</sub> Mn <sub>0.75</sub> O <sub>4</sub><br>/EC-300 | 1.675 V, 1.57 V                          | 0.86 V, 2.47<br>mA/cm <sup>2</sup>      | 0.815 V                            |
| 70 wt% Co <sub>2.25</sub> Mn <sub>0.75</sub> O <sub>4</sub><br>/EC-300 | 1.66 V, 1.57 V                           | 0.86 V, 2.61<br>mA/cm <sup>2</sup>      | 0.80 V                             |
| 85 wt% Co <sub>2.25</sub> Mn <sub>0.75</sub> O <sub>4</sub><br>/EC-300 | 1.67 V, 1.57 V                           | 0.86 V, 2.47<br>mA/cm <sup>2</sup>      | 0.81 V                             |
| 55 wt% Co <sub>2.25</sub> Mn <sub>0.75</sub> O <sub>4</sub>            | 1.70 V, 1.61 V                           | 0.84 V, 2.47                            | 0.86 V                             |



|                                                                          |                |                                    |        |
|--------------------------------------------------------------------------|----------------|------------------------------------|--------|
| /EC-600JD                                                                |                | mA/cm <sup>2</sup>                 |        |
| 70 wt% Co <sub>2.25</sub> Mn <sub>0.75</sub> O <sub>4</sub><br>/EC-600JD | 1.67 V, 1.58 V | 0.86 V, 2.61<br>mA/cm <sup>2</sup> | 0.81 V |
| 85 wt% Co <sub>2.25</sub> Mn <sub>0.75</sub> O <sub>4</sub><br>/EC-600JD | 1.68 V, 1.58 V | 0.86 V, 2.47<br>mA/cm <sup>2</sup> | 0.82 V |
| 55 wt%<br>Co <sub>2.25</sub> Mn <sub>0.75</sub> O <sub>4</sub> /Vulcan   | 1.68 V, 1.57 V | 0.84 V, 2.25<br>mA/cm <sup>2</sup> | 0.84 V |
| 70 wt%<br>Co <sub>2.25</sub> Mn <sub>0.75</sub> O <sub>4</sub> /Vulcan   | 1.67 V, 1.57 V | 0.81 V, 2.25<br>mA/cm <sup>2</sup> | 0.86 V |
| 85 wt%<br>Co <sub>2.25</sub> Mn <sub>0.75</sub> O <sub>4</sub> /Vulcan   | 1.69 V, 1.57 V | 0.80 V, 2.25<br>mA/cm <sup>2</sup> | 0.89 V |
| 55wt%<br>Co <sub>2.25</sub> Mn <sub>0.75</sub> O <sub>4</sub> /Graphene  | 1.70 V, 1.59 V | 0.77 V, 2.08<br>mA/cm <sup>2</sup> | 0.93 V |
| 70 wt%<br>Co <sub>2.25</sub> Mn <sub>0.75</sub> O <sub>4</sub> /Graphene | 1.68 V, 1.57 V | 0.76 V, 2.5<br>mA/cm <sup>2</sup>  | 0.92 V |
| 85 wt%<br>Co <sub>2.25</sub> Mn <sub>0.75</sub> O <sub>4</sub> /Graphene | 1.69 V, 1.57 V | 0.76 V, 2.08<br>mA/cm <sup>2</sup> | 0.93 V |
| 55 wt%<br>Co <sub>2.25</sub> Mn <sub>0.75</sub> O <sub>4</sub> /CNT      | 1.68 V, 1.58 V | 0.87 V, 2.47<br>mA/cm <sup>2</sup> | 0.81 V |
| 70 wt%<br>Co <sub>2.25</sub> Mn <sub>0.75</sub> O <sub>4</sub> /CNT      | 1.66 V, 1.58 V | 0.87 V, 2.61<br>mA/cm <sup>2</sup> | 0.79 V |
| 85 wt%<br>Co <sub>2.25</sub> Mn <sub>0.75</sub> O <sub>4</sub> /CNT      | 1.67 V, 1.58 V | 0.87 V, 2.45<br>mA/cm <sup>2</sup> | 0.80 V |

**Table S6.** Summary of bifunctional catalytic performance of  $\text{Co}_{2.25}\text{Mn}_{0.75}\text{O}_4/\text{CNT}$  and different  $\text{Co}_{2.25}\text{Mn}_{0.75}\text{O}_4/\text{NCNT}$  samples

| Catalyst                                                  | OER ( $E_{10}$ ) | ORR ( $E_{1/2}$ ) | $\Delta E$<br>( $E_{10}-E_{1/2}$ ) |
|-----------------------------------------------------------|------------------|-------------------|------------------------------------|
| $\text{Co}_{2.25}\text{Mn}_{0.75}\text{O}_4/\text{CNT}$   | 1.66 V           | 0.87 V            | 0.79 V                             |
| $\text{Co}_{2.25}\text{Mn}_{0.75}\text{O}_4/\text{CNT-1}$ | 1.62 V           | 0.80 V            | 0.82 V                             |
| $\text{Co}_{2.25}\text{Mn}_{0.75}\text{O}_4/\text{CNT-2}$ | 1.61 V           | 0.80 V            | 0.81 V                             |
| $\text{Co}_{2.25}\text{Mn}_{0.75}\text{O}_4/\text{CNT-3}$ | 1.60 V           | 0.88 V            | 0.72 V                             |
| $\text{Co}_{2.25}\text{Mn}_{0.75}\text{O}_4/\text{CNT-4}$ | 1.64 V           | 0.73 V            | 0.91 V                             |
| $\text{Co}_{2.25}\text{Mn}_{0.75}\text{O}_4/\text{CNT-5}$ | 1.66 V           | 0.69 V            | 0.97 V                             |
